# Supplementary material for: Tuning Texture and Morphology of Mesoporous TiO2 by Non-Hydrolytic Sol-Gel Syntheses
Source: PubMed Central journal article supplement (PMC6278356; doi:10.3390/molecules23113006), 2018-11-17
Supplement: molecules-23-03006-s001.pdf [file molecules-23-03006-s001.pdf]

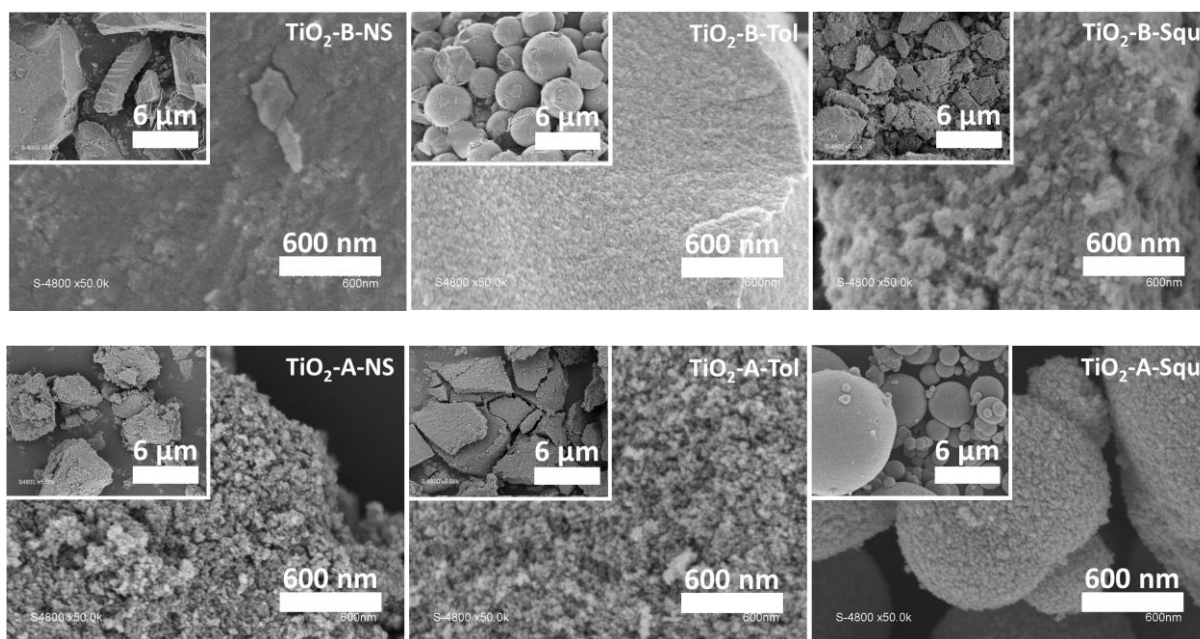

**Figure S1:** SEM images of non-calcined TiO<sub>2</sub> samples
